# Supplementary material for: Reversal of deficits in aged skeletal muscle during disuse and recovery in response to treatment with a secrotome product derived from partially differentiated human pluripotent stem cells
Source: PubMed Central journal article supplement (PMC8602548; doi:10.1007/s11357-021-00423-0), 2021-08-24

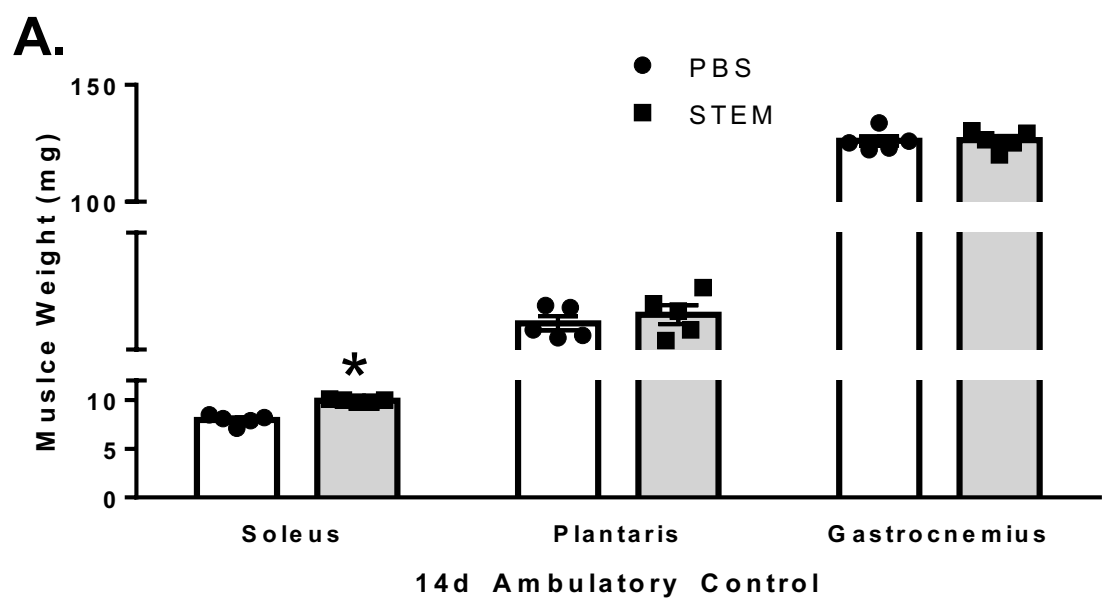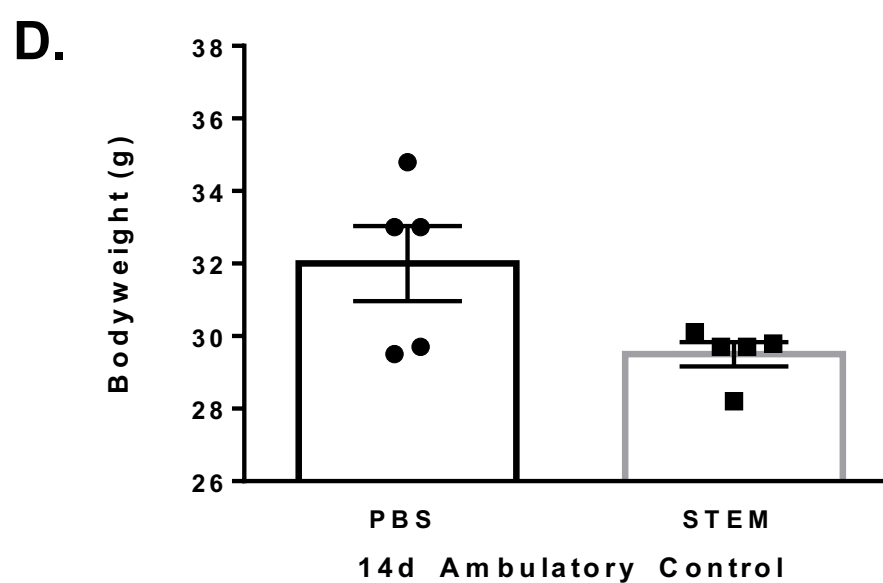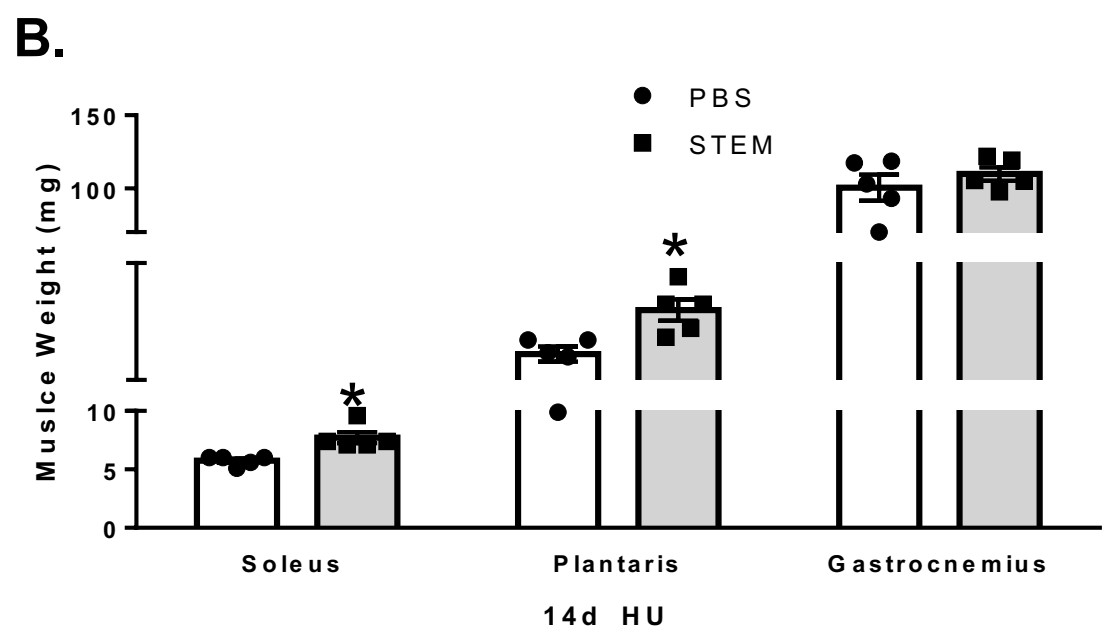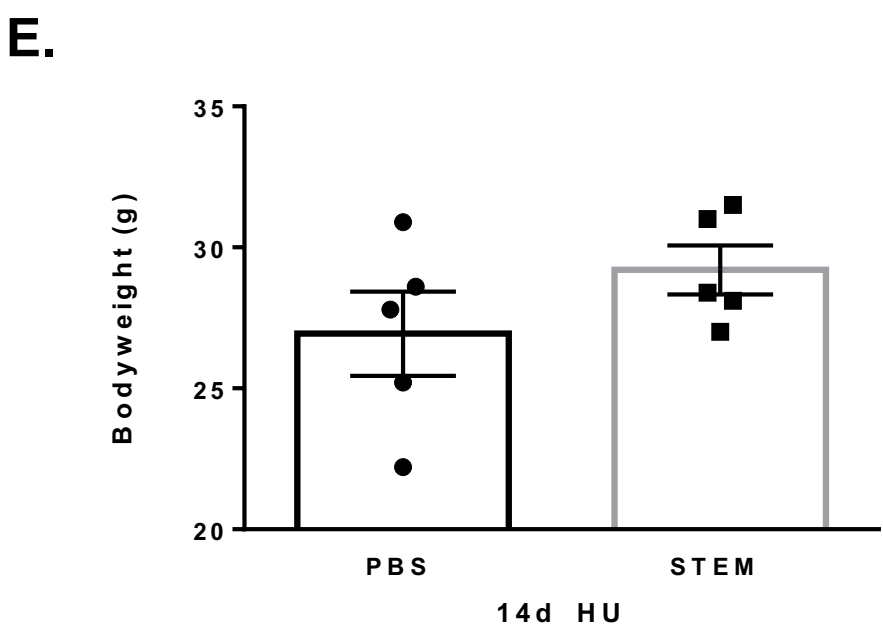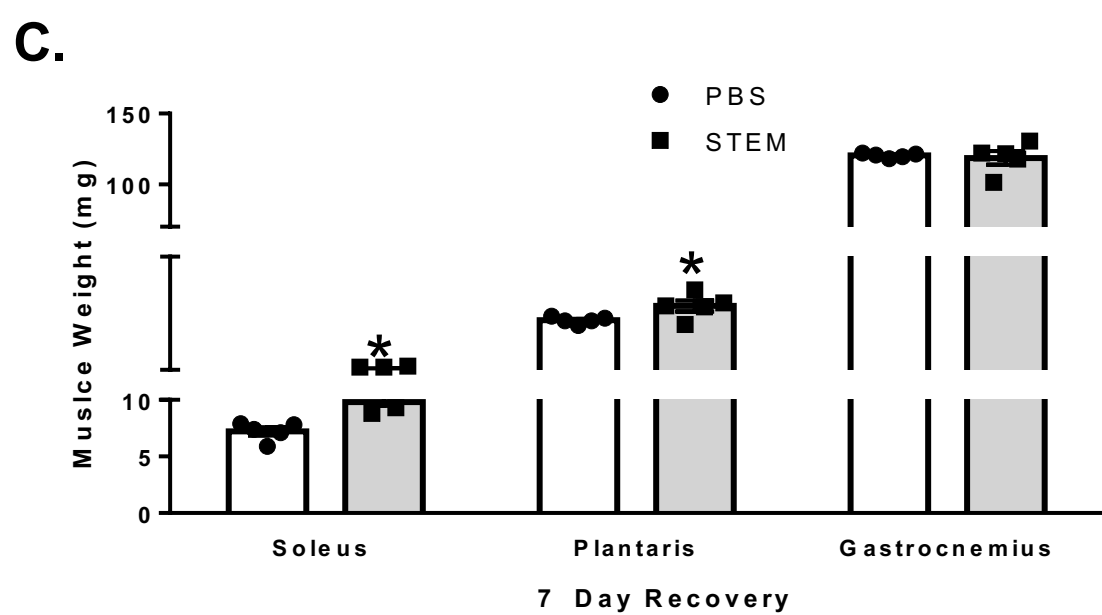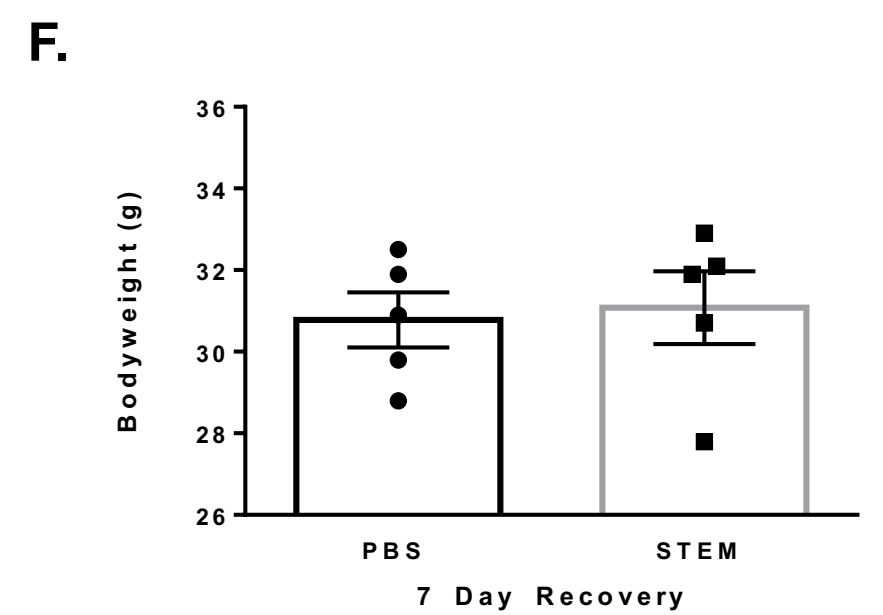

Supplement: 11357_2021_423_MOESM2_ESM.pdf [file 11357_2021_423_MOESM2_ESM.pdf]
